# Supplementary material for: Multiple reflection optimization package for X-ray diffraction
Source: Royal Society of Chemistry journal article supplement (doi:10.1039/d1ce00204j), 2021-01-01
Supplement: d1ce00204j1.pdf [file d1ce00204j1.pdf]

## S1. Validation of MROX software

Validation of MROX is accomplished by performing several simulations using LEPTOS<sup>®</sup> commercial software, available at the Bruker D8 series AXS diffractometers. LEPTOS<sup>®</sup> implements the 2x2 and 4x4 matrix recursive methods developed by S. Stepanov *et. al.*<sup>1</sup> Both matrix methods are approximations to the pure dynamical theory of X-ray diffraction in order to increase the speed and versatility in the simulation and fitting algorithms. At this moment, a set of more than 160 simulations are compared and close to perfect agreement is found. The total set of figures 1 show a comparison between MROX and LEPTOS<sup>®</sup> simulations for different crystals and reflections with increasing layer complexity. In all simulations, the blue line corresponds to the simulation using the MROX code, whereas the open black circles correspond to the simulation using LEPTOS<sup>®</sup> software. Figure 1a) depicts to the case of a 0004 2 $\theta$ - $\omega$  simulation of a bulk Al<sub>0.7</sub>Ga<sub>0.3</sub>N crystal. The single layer structure of the simulated reflection is shown on the upper right side of the MROX layout (inside table). Figure 1b) reflects the comparison between both codes of a 006 2 $\theta$ - $\omega$  simulation from an orthorhombic 40 nm strained CaMnO<sub>3</sub> thin film “grown” on top of relaxed-bulk CaMnO<sub>3</sub>. The third comparison, shown in figure 1c) is from GaAs, a cubic crystal, where a strained layer of the same material is included at the surface. Follows in figure 1d), a strained Si 150 nm thick layer is simulated on top of a Si substrate. The comparison between figures 1b) to 1d) allows concluding that the thickness effect on the diffractogram is perfectly simulated in MROX. Moreover, the three cases refer to different crystalline structures and reflections. The fifth case is from a double Si layer of 100 and 20 nm, respectively, each layer differently strained on top of a Si substrate. The differences observed are very small and can be interpreted by the more sophisticated simulation done using the matrix recursive method developed by S. Stepanov and implemented on LEPTOS.

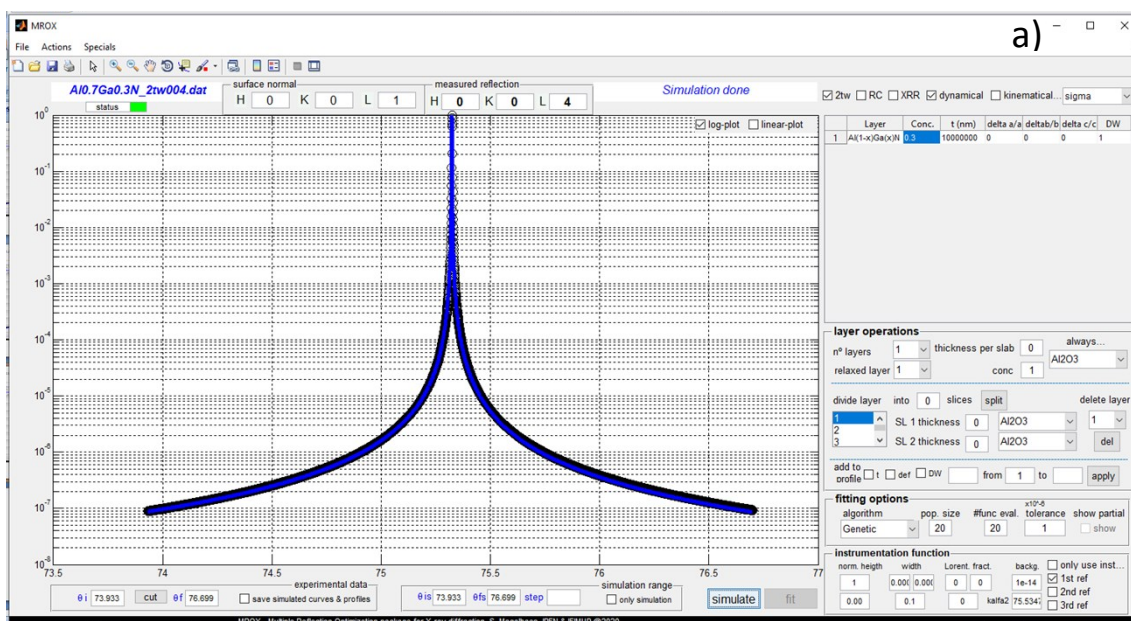

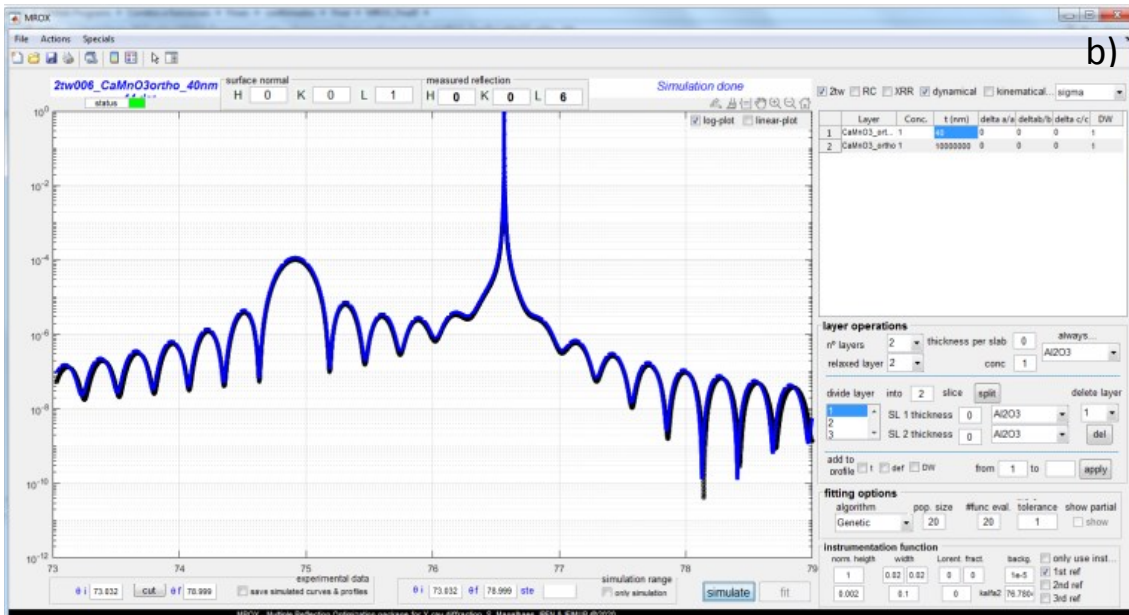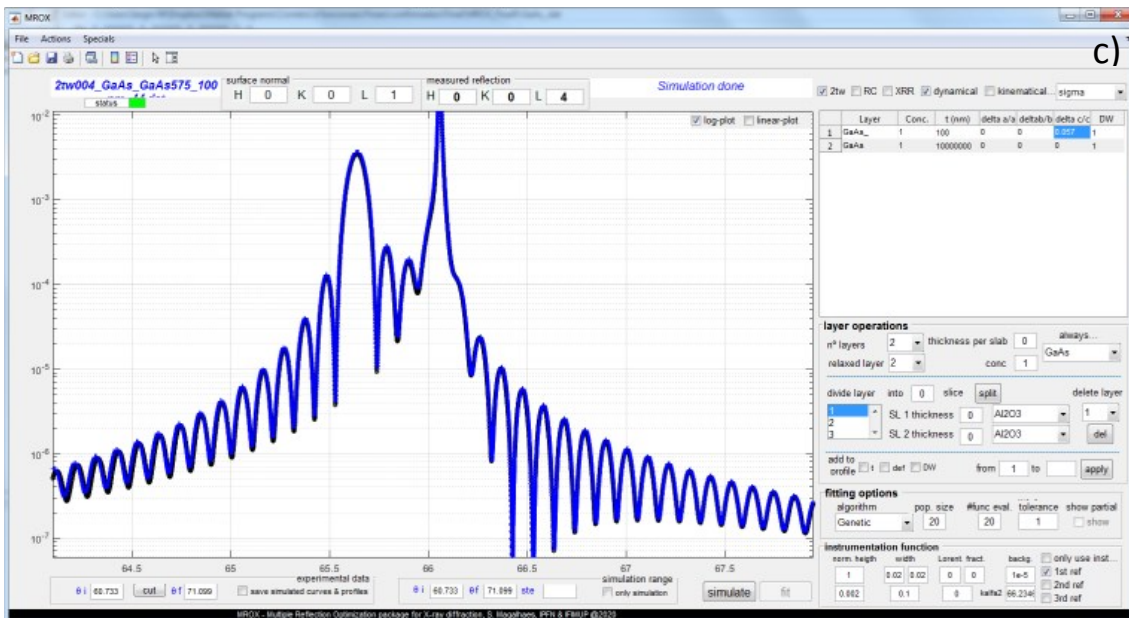

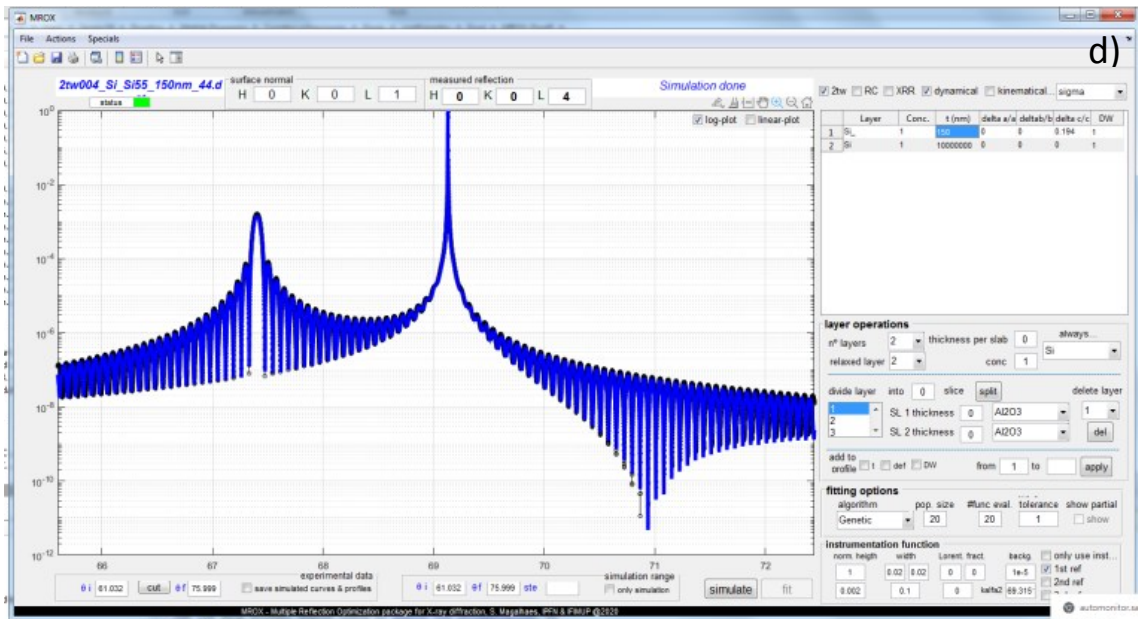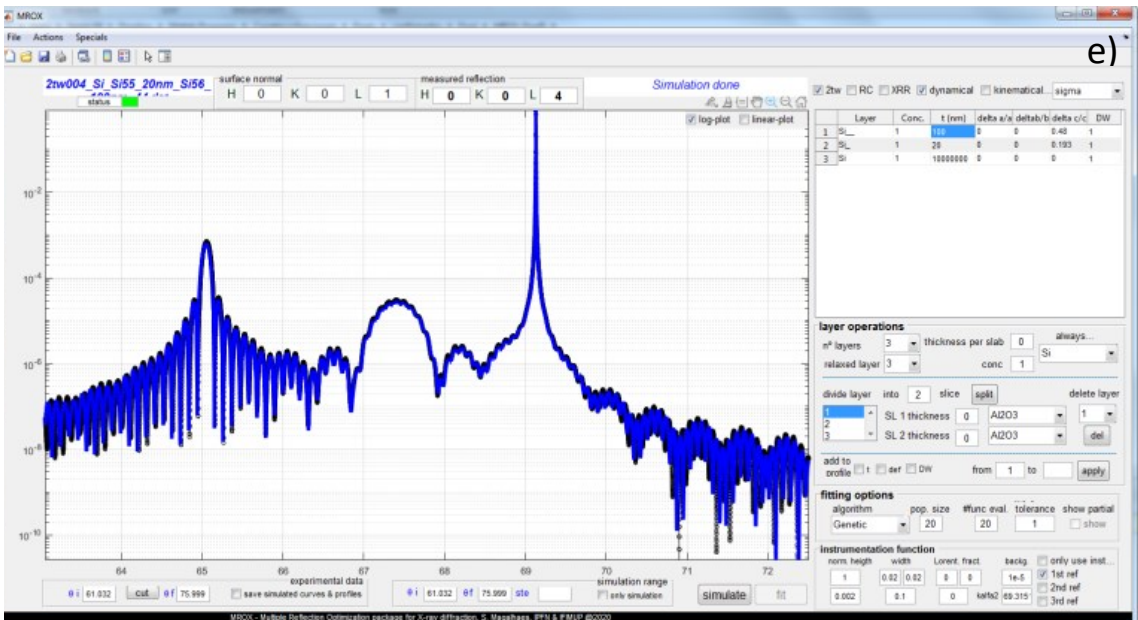

**Figure 1** MROX layouts comparing the simulations of a 0004  $2\theta$ - $\omega$  scan of a bulk  $\text{Al}_{0.7}\text{Ga}_{0.3}\text{N}$  alloy, a), 006  $2\theta$ - $\omega$  of an orthorhombic strained  $\text{CaMnO}_3$  40 nm thick simulated on top of the same crystal substrate, b), 004  $2\theta$ - $\omega$  of a cubic 100 nm strained GaAs simulated on top of a GaAs substrate, c), and 004  $2\theta$ - $\omega$  of a cubic Si substrate, where 1 d) and 2 layers e) of increasing strained Si and different thicknesses.

## Reference

[1] S. A. Stepanov, E. A. Kondrashkina, R. Kohler, D. V. Novikov, G. Materlik and S. M. Durbin, Phys. Rev. B, 1998, 57, 4829.
